# Supplementary material
Source: Royal Society of Chemistry journal article supplement (doi:10.1039/d6ay00361c)
Supplement: d6ay00361c1.pdf [file d6ay00361c1.pdf]

## Electrochemically Amplified Nanozymatic Activity of Biolinker-based Synthesized Co-MOF for H<sub>2</sub>O<sub>2</sub> and Dopamine Detection

Jasmine Look<sup>1</sup>, Syed Rahin Ahmed<sup>\*1</sup>, Mohamed Hassan Mahana<sup>2,3</sup>, Md. Shalauddin<sup>\*4</sup>, Shamima Akhter<sup>\*5</sup>, Wan Jeffrey Basirun<sup>6,7\*</sup>, Seshasai Srinivasan<sup>\*1,2</sup> and Amin Reza Rajabzadeh<sup>\*1,2</sup>

<sup>1</sup>W Booth School of Engineering Practice and Technology, McMaster University, 1280 Main Street West Hamilton, Ontario, Canada L8S 4L7

<sup>2</sup>School of Biomedical Engineering, McMaster University, 1280 Main Street West Hamilton, Ontario, Canada L8S 4L7

<sup>3</sup>Department of Pharmaceutical Analytical Chemistry, Faculty of Pharmacy, Tanta University, Tanta 3111, Egypt

<sup>4</sup>School of Pharmacy, Faculty of Health and Medical Sciences, Taylor's University, Subang Jaya, Selangor 47500, Malaysia

<sup>5</sup>Department of Pharmaceutical Chemistry, School of Pharmacy, IMU University, Bukit Jalil, 57000 Kuala Lumpur, Malaysia.

<sup>6</sup>Nanotechnology and Catalysis Research Center (NANOCAT), Universiti Malaya, 50603 Kuala Lumpur, Malaysia.

<sup>7</sup>Department of Chemistry, Faculty of Science, Universiti Malaya, 50603 Kuala Lumpur, Malaysia.

*\*E-mail address:* SRA: [ahmes91@mcmaster.ca](mailto:ahmes91@mcmaster.ca), MS: [md.shalauddin@taylors.edu.my](mailto:md.shalauddin@taylors.edu.my), SA: [shamimaakhter@imu.edu.my](mailto:shamimaakhter@imu.edu.my), WJB: [jeff@um.edu.my](mailto:jeff@um.edu.my), SS: [ssriniv@mcmaster.ca](mailto:ssriniv@mcmaster.ca), ARR: [rajaba@mcmaster.ca](mailto:rajaba@mcmaster.ca)

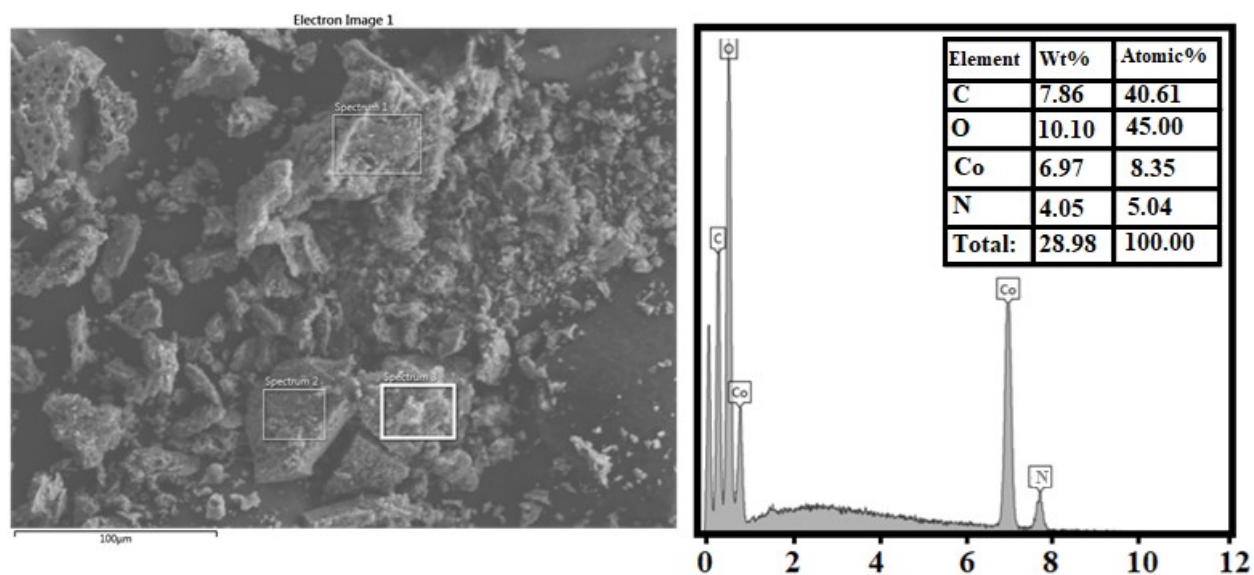

**Figure S1:** EDX analysis for Co-MOF nanoparticles.

**Table S1:** Comparison study of  $K_m$  and  $V_{max}$  values for present work with others reported using  $H_2O_2$  and TMB as substrates in peroxidase and peroxidase-like enzymatic activity.

| Nanomaterial         | $H_2O_2$            |                         | TMB                  |                         | Ref. |
|----------------------|---------------------|-------------------------|----------------------|-------------------------|------|
|                      | $K_m$ ( $\mu M$ )   | $V_{max}$ ( $\mu M/s$ ) | $K_m$ ( $\mu M$ )    | $V_{max}$ ( $\mu M/s$ ) |      |
| HRP                  | $3.7 \times 10^3$   | $8.71 \times 10^{-2}$   | $4.34 \times 10^2$   | $1 \times 10^{-1}$      | [1]  |
| PtPdNPs/GNs          | $3.450 \times 10^3$ | $1.224 \times 10^{-1}$  | 40                   | $4.267 \times 10^{-1}$  | [2]  |
| Ni-MOF               | $2.490 \times 10^3$ | 1.3                     | $3.65 \times 10^2$   | $6.53 \times 10^{-2}$   | [3]  |
| WS <sub>2</sub> /rGO | $1.0 \times 10^4$   | $9.332 \times 10^{-3}$  | $2.2406 \times 10^3$ | $9.606 \times 10^{-2}$  | [4]  |

|        |                    |                      |                   |                      |                                  |
|--------|--------------------|----------------------|-------------------|----------------------|----------------------------------|
| Co-MOF | 1.31               | $2.2 \times 10^{-4}$ | 0.74              | $1.3 \times 10^{-3}$ | This work.                       |
| Co-MOF | $1.02 \times 10^4$ | $1.5 \times 10^{-2}$ | $1.6 \times 10^2$ | $1.3 \times 10^{-3}$ | Elelctronanozyme<br>Conventional |

## References

- [1] J. Guo, et al., Label-free fluorescence detection of hydrogen peroxide and glucose based on the Ni-MOF nanozyme-induced self-ligand emission, *Microchim. Acta* 189 (6) (May 2022) 219, <https://doi.org/10.1007/s00604-022-05313-6>.
- [2] X. Chen, B. Su, Z. Cai, X. Chen, M. Oyama, PtPd nanodendrites supported on graphene nanosheets: a peroxidase-like catalyst for colorimetric detection of H<sub>2</sub>O<sub>2</sub>, *Sens. Actuators B Chem.* 201 (Oct. 2014) 286–292, <https://doi.org/10.1016/j.snb.2014.04.067>.
- [3] J. Chen, Y. Shu, H. Li, Q. Xu, X. Hu, Nickel metal-organic framework 2D nanosheets with enhanced peroxidase nanozyme activity for colorimetric detection of H<sub>2</sub>O<sub>2</sub>, *Talanta* 189 (Nov. 2018) 254–261, <https://doi.org/10.1016/j.talanta.2018.06.075>.
- [4] S. Keerthana, A. Rajapriya, C. Viswanathan, N. Ponpandian, Enzyme likecolorimetric sensing of H<sub>2</sub>O<sub>2</sub> based on intrinsic peroxidase mimic activity of WS<sub>2</sub> nanosheets anchored reduced graphene oxide, *J. Alloys Compd.* 889 (Dec. 2021) 161669, <https://doi.org/10.1016/j.jallcom.2021.161669>.
